# Supplementary material for: Reliability and validity of the physical activity monitor for assessing energy expenditures in sedentary, regularly exercising, non-endurance athlete, and endurance athlete adults
Source: PeerJ. 2020 Aug 24;8:e9717. doi: 10.7717/peerj.9717 (PMC7450994; doi:10.7717/peerj.9717)
Supplement: Supplemental Information 1 [file peerj-08-9717-s001.xlsx]

## Sheet: sedentary group
Sedentary group
VO2 EE								Acti EE (Hip)								HHR									BW	Age	Height	BMI	BF%	Musle mass	RMR		VM								Insert modified models
	4.8	6.42	8.04	9.66	11.28	(km/h)			4.8	6.42	8.04	9.66	11.28	(km/h)			4.8	6.42	8.04	9.66	11.28	(km/h)												4.8	6.42	8.04	9.66	11.28	(km/h)			4.8	6.42	8.04	9.66	11.28	(km/h)
S1	0.0626722	0.109642	0.14668	0.175262	0.20522			S1	0.0702149	0.133223	0.152045	0.198843	0.225207			S1	17	23.5	77.6667	86.6667	98			S1	48.4	24	161	18.7	10.7	20.1	1184		S1	4906	7362	9128	10348	11548			S1	0.0881014	0.114638	0.167474	0.184592	0.203121
S2	0.070297	0.106271	0.141254	0.173927	0.20462			S2	0.0642376	0.109089	0.178238	0.194416	0.219941			S2	38.3333	60.5	78.6667	88	100.167			S2	50.5	23	160	19.7	12.5	20.4	1191		S2	3467	6069	9353	10121	11330			S2	0.0890718	0.127608	0.169553	0.182831	0.202009
S3	0.0664951	0.0995281	0.138996	0.161682	0.181845			S3	0.05574	0.0914672	0.121223	0.139163	0.1687			S3	13.5	31.3333	54	79.5	95.1667			S3	77.7	23	172	26	12.9	36.9	1769		S3	2991	4136	7772	9079	9778			S3	0.0597187	0.082186	0.130369	0.159523	0.176498
S4	0.0587935	0.109151	0.134714	0.161299	0.191973			S4	0.0654601	0.112669	0.143374	0.172239	0.199402			S4	42.5	60.5	66.1667	68.6667	68.6667			S4	65.2	24	167	23.4	22.7	22.9	1393		S4	4246	6525	12134	12015	12454			S4	0.0945292	0.127316	0.181662	0.182296	0.186247
S5	0.0659631	0.0901495	0.140062	0.147537	0.167546			S5	0.058628	0.128348	0.156953	0.171227	0.176346			S5	14.3333	32.6667	54.1667	68.5	81.6667			S5	75.8	27	178	23.9	15.8	33.9	1667		S5	3342	5112	10346	11363	11729			S5	0.0640141	0.0924475	0.154216	0.173145	0.185418
S6	0.0833333	0.123876	0.150805	0.17431	0.203895			S6	0.0670562	0.1175	0.144911	0.168047	0.175695			S6	27.6667	65.6667	94	113.167	124.333			S6	67.6	22	179	23.4	13.8	30.3	1531		S6	3202	7043	9418	10253	10738			S6	0.0742993	0.134784	0.175483	0.196069	0.20805
S7	0.0624478	0.11873	0.146199	0.162907	0.189432			S7	0.0745739	0.109316	0.145451	0.152469	0.149987			S7	25.5	46.5	78	95.1667	105.667			S7	79.8	26	178	25.2	22.9	31.8	1598		S7	4183	5575	9499	10025	10838			S7	0.0780028	0.104853	0.161652	0.178093	0.192571
S8	0.0637681	0.106522	0.148551	0.174275	0.202536			S8	0.0725217	0.0956087	0.119304	0.141543	0.159543			S8	19.1667	51.6667	73	85	95.3333			S8	46	23	158	18.4	11.1	18.4	1124		S8	3225	5521	6285	7506	8284			S8	0.0751677	0.117997	0.139422	0.158595	0.172644
S9	0.0904472	0.121775	0.155989	0.189024	0.213206			S9	0.0505081	0.125427	0.161768	0.187541	0.213963			S9	19.6667	43.6667	74.6667	91.5	101.167			S9	49.2	22	157	20	12.3	19.7	1167		S9	3012	4628	10007	11661	11933			S9	0.0726349	0.103547	0.1731	0.199466	0.208507
S10	0.0615655	0.0853122	0.141821	0.162489	0.198769			S10	0.0651583	0.0856596	0.130818	0.145528	0.173536			S10	29.6667	50.1667	89.5	111.167	117.167			S10	75.8	24	171	25.9	23.2	29.6	1506		S10	3560	5022	8237	9285	9843			S10	0.0764335	0.103572	0.159333	0.183541	0.192655
S11	0.0737299	0.0993391	0.136514	0.165221	0.174515			S11	0.0709789	0.0984758	0.150285	0.190161	0.195192			S11	35	52.1667	79.6667	96.6667	105.167			S11	80.7	23	162	30.7	34.2	25.8	1375		S11	3891	5976	9904	12930	13312			S11	0.0815847	0.112057	0.166164	0.204992	0.214227
S12	0.0658083	0.121602	0.153791	0.178112	0.193491			S12	0.0628541	0.126717	0.145193	0.159893	0.169421			S12	18	47.8333	81.5	99	110.833			S12	46.6	24	153	19.9	10.4	19.6	1152		S12	4055	4226	7663	8306	8724			S12	0.0816626	0.103548	0.157442	0.175164	0.186996
S13	0.0733945	0.114679	0.142857	0.171909	0.204893			S13	0.0653211	0.108468	0.129476	0.140013	0.178729			S13	33.5	64.6667	85.5	104	118.833			S13	76.3	25	167	27.4	28.2	26.5	1409		S13	3605	6194	8203	8960	9866			S13	0.0793033	0.12386	0.156149	0.175579	0.19385
S14	0.0621319	0.103062	0.142521	0.174923	0.200848			S14	0.0545936	0.0898763	0.12864	0.140618	0.164028			S14	27.1667	49.1667	81	98.1667	112.5			S14	56.6	20	162	21.6	12.6	24	1320		S14	2854	4730	7856	7963	9207			S14	0.0741153	0.106003	0.155848	0.168518	0.18949
S15	0.0683304	0.110517	0.130422	0.153298	0.18568			S15	0.0507487	0.139663	0.170517	0.197932	0.221016			S15	42.5	71	86.3333	99	110.333			S15	56.1	19	162	21.6	16.5	21.7	1226		S15	3241	4604	9554	10999	12217			S15	0.0882051	0.119909	0.174916	0.19656	0.215251
S16	0.0812425	0.122616	0.145511	0.17503	0.209379			S16	0.079319	0.110251	0.139982	0.153746	0.156846			S16	33.8333	56.6667	73.3333	84.3333	95.3333			S16	55.8	21	160	21.8	16.8	21.2	1211		S16	3672	6345	7904	8624	8789			S16	0.0862631	0.125892	0.15129	0.165272	0.174259
S17	0.0779221	0.118506	0.154102	0.181123	0.206169			S17	0.061526	0.0990097	0.125503	0.143588	0.16414			S17	19.8333	45.3333	74.8333	89.5	98.3333			S17	61.6	22	164	22.9	12.9	27.2	1421		S17	3633	4933	7335	8385	9572			S17	0.0746299	0.103721	0.145458	0.164911	0.181618
S18	0.0670103	0.09892	0.142366	0.170594	0.199067			S18	0.0729897	0.109228	0.167511	0.188571	0.196907			S18	30.8333	62.8333	83.8333	103.667	117.333			S18	67.9	25	161	26.2	25.3	23.4	1291		S18	4233	5464	10266	11611	12143			S18	0.0856482	0.118551	0.176091	0.201723	0.215831
S19	0.0686432	0.0990919	0.143697	0.175481	0.204861			S19	0.0568109	0.0873878	0.0968109	0.110256	0.160288			S19	12	30.3333	62.3333	74.3333	89.1667			S19	62.4	35	178	19.7	3.6	33.4	1639		S19	2814	4023	5748	6537	9470			S19	0.0616774	0.0850617	0.122411	0.137696	0.174209
S20	0.0734463	0.106462	0.152189	0.183263	0.194209			S20	0.0637924	0.0787288	0.0113422	0.136695	0.164121			S20	32.8333	48.6667	75	91.8333	101.833			S20	94.4	34	176	30.5	35.8	32.9	1636		S20	3098	4422	4840	6905	7563			S20	0.0688737	0.0915881	0.113309	0.143375	0.156117
S21	0.0664951	0.0995281	0.138996	0.181682	0.201845			S21	0.05574	0.0864672	0.121223	0.139163	0.1687			S21	13.5	31.3333	54	79.5	95.1667			S21	77.7	23	172	26	12.9	36.9	1769		S21	2744	3986	7383	8696	9155			S21	0.0574957	0.080836	0.126868	0.156076	0.170891
S22	0.0587935	0.0915133	0.134714	0.161299	0.191973			S22	0.0754601	0.102669	0.173374	0.182239	0.209402			S22	42.5	60.5	66.1667	68.6667	68.6667			S22	65.2	24	167	23.4	22.7	22.9	1393		S22	4081	6679	9412	10408	11392			S22	0.0930442	0.128702	0.157164	0.167833	0.176689
S23	0.0659631	0.0901495	0.140062	0.147537	0.167546			S23	0.058628	0.0834828	0.156953	0.171227	0.176346			S23	14.3333	32.6667	54.1667	68.5	81.6667			S23	75.8	27	178	23.9	15.8	33.9	1667		S23	3399	5450	9537	10291	10625			S23	0.0645271	0.0954895	0.146935	0.163497	0.175482
S24	0.0624478	0.0873016	0.146199	0.162907	0.189432			S24	0.0745739	0.0931579	0.145451	0.152469	0.149987			S24	25.5	46.5	78	95.1667	105.667			S24	79.8	26	178	25.2	22.9	31.8	1598		S24	4056	5624	8999	9541	10147			S24	0.0768598	0.105294	0.157152	0.173737	0.186352
S25	0.0615655	0.0853122	0.141821	0.162489	0.198769			S25	0.0651583	0.0856596	0.130818	0.145528	0.173536			S25	29.6667	50.1667	89.5	111.167	117.167			S25	75.8	24	171	25.9	23.2	29.6	1506		S25	3533	4938	8498	9290	9066			S25	0.0761905	0.102816	0.161682	0.183586	0.185662
S26	0.0737299	0.0993391	0.136514	0.165221	0.174515			S26	0.0709789	0.0984758	0.150285	0.190161	0.195192			S26	35	52.1667	79.6667	96.6667	105.167			S26	80.7	23	162	30.7	34.2	25.8	1375		S26	4103	6132	9676	11374	11424			S26	0.0834927	0.113461	0.164112	0.190988	0.197235
S27	0.0658083	0.121602	0.153791	0.178112	0.193491			S27	0.0628541	0.116672	0.145193	0.159893	0.169421			S27	18	47.8333	81.5	99	110.833			S27	46.6	24	153	19.9	10.4	19.6	1152		S27	4044	4438	7720	8395	8790			S27	0.0815636	0.105456	0.157955	0.175965	0.18759
S28	0.0683304	0.110517	0.130422	0.153298	0.18568			S28	0.0507487	0.096631	0.170517	0.197932	0.221016			S28	42.5	71	86.3333	99	110.333			S28	56.1	19	162	21.6	16.5	21.7	1226		S28	3043	4590	9646	9358	10124			S28	0.0864231	0.119783	0.175744	0.181791	0.196414
S29	0.0670103	0.09892	0.142366	0.170594	0.199067			S29	0.0729897	0.0922828	0.167511	0.188571	0.196907			S29	30.8333	62.8333	83.8333	103.667	117.333			S29	67.9	25	161	26.2	25.3	23.4	1291		S29	4133	5224	10431	10950	11429			S29	0.0847482	0.116391	0.177576	0.195774	0.209405
S30	0.0734463	0.116462	0.152189	0.183263	0.194209			S30	0.0637924	0.0787288	0.0834216	0.146695	0.164121			S30	32.8333	48.6667	75	91.8333	101.833			S30	94.4	34	176	19.7	35.8	32.9	1636		S30	3454	4404	4286	6367	7151			S30	0.0720777	0.0914261	0.108323	0.138533	0.152409

## Sheet: Exercise habit group
Exercise habit group
VO2 EE								Acti EE (Hip)								HHR									BW	Age	Height	BMI	BF%	Musle mass	RMR		VM								Insert modified models
	4.8	6.42	8.04	9.66	11.28	(km/h)			4.8	6.42	8.04	9.66	11.28	(km/h)			4.8	6.42	8.04	9.66	11.28	(km/h)												4.8	6.42	8.04	9.66	11.28	(km/h)			4.8	6.42	8.04	9.66	11.28	(km/h)
S31	0.0627976	0.135	0.16	0.183	0.224			S31	0.07175	0.148839	0.172946	0.183232	0.203857			S31	15.1667	45.6667	58.5	79.1667	90.1667			S31	56	23	165	21.5	8.2	30	1505		S31	4866	8924	10192	10207	10241			S31	0.0842187	0.141542	0.161706	0.175936	0.183744
S32	0.0639394	0.111	0.134	0.168	0.194			S32	0.0513818	0.10976	0.122909	0.168055	0.173073			S32	20.5	53.5	70.1667	98.5	109			S32	55	26	160	21.3	23.1	22.9	1273		S32	3301	5173	7000	9332	9593			S32	0.07407	0.113424	0.141234	0.181545	0.191055
S33	0.0625604	0.119	0.141	0.158	0.205			S33	0.0705217	0.0924783	0.114174	0.137594	0.183754			S33	22.8333	39.8333	68.8333	89.8333	103.167			S33	69	22	171	24.5	19.1	33	1621		S33	4068	4842	6899	7770	8169			S33	0.0783783	0.0969383	0.135229	0.15739	0.170075
S34	0.0632246	0.107	0.135	0.156	0.182			S34	0.0714348	0.0886848	0.109651	0.135543	0.169283			S34	31	63.6667	79.3333	100	111.333			S34	92	25	171	31	32.3	35.2	1712		S34	4643	4837	5949	6729	7051			S34	0.082246	0.106271	0.126963	0.148078	0.158705
S35	0.063125	0.094	0.139	0.155	0.187			S35	0.0736375	0.0984875	0.113637	0.124737	0.158875			S35	22.3333	36.8333	60.3333	81.6667	94			S35	80	27	172	27.7	24.4	35.5	1706		S35	4127	5995	7134	7966	8280			S35	0.0752793	0.10198	0.128258	0.150296	0.161533
S36	0.0626761	0.098	0.158	0.164	0.194			S36	0.076493	0.108225	0.165465	0.164479	0.157507			S36	33.5	50.8333	80.8333	90.5	103.5			S36	71	29	178	22.4	18.5	32.4	1618		S36	4968	6551	10371	10505	11840			S36	0.093155	0.119223	0.174063	0.181862	0.202743
S37	0.0611494	0.087	0.13	0.155	0.189			S37	0.0719724	0.0901007	0.120552	0.144593	0.161517			S37	19.6667	31	52.1667	65.1667	79.8333			S37	72.5	32	177	23.1	17.1	34.2	1669		S37	4833	6403	6800	7055	7529			S37	0.0820572	0.103917	0.121925	0.133086	0.147355
S38	0.065	0.113	0.135	0.174	0.18			S38	0.0555294	0.119563	0.153392	0.187451	0.208098			S38	29.8333	77.5	89.5	104.167	114.667			S38	51	25	150	22.7	33.7	18	1102		S38	3157	4602	10723	11507	12048			S38	0.0803353	0.125849	0.189122	0.206181	0.218211
S39	0.077	0.111	0.15	0.159	0.201			S39	0.0764472	0.111746	0.147366	0.149387	0.154227			S39	26	45.3333	76.1667	91.8333	107.667			S39	65.3	24	162	24.9	25.8	26.6	1417		S39	4515	6682	8867	8993	9291			S39	0.0856673	0.118356	0.159049	0.170868	0.184348
S40	0.074	0.12	0.15	0.156	0.198			S40	0.0688667	0.108805	0.135517	0.1555	0.175717			S40	30.5	42.6667	76	93	102.167			S40	60	27	173	20	16.2	28.1	1457		S40	3640	5118	6665	10614	10959			S40	0.082446	0.104046	0.140702	0.187837	0.197194
S41	0.065	0.11	0.134	0.163	0.18			S41	0.0546654	0.119541	0.140446	0.172695	0.199405			S41	33	47.6667	72.3333	89.3333	97.8333			S41	53.8	21	168	19.1	27.4	20.9	1214		S41	3745	5550	7828	9461	10812			S41	0.0869498	0.113197	0.150522	0.176813	0.194769
S42	0.068	0.116	0.155	0.182	0.217			S42	0.0676897	0.123414	0.168603	0.1815	0.199879			S42	24.8333	48.1667	45.6667	74	98.3333			S42	58	21	164	21.6	18.2	26.7	1394		S42	4087	6036	9590	10292	11293			S42	0.0832023	0.116657	0.146938	0.172579	0.198183
S43	0.069	0.127	0.158	0.169	0.187			S43	0.065706	0.119012	0.173385	0.199188	0.209865			S43	20.6667	56	78.3333	95.8333	105.833			S43	51.7	19	160	20.2	27.7	20.1	1178		S43	4086	5271	10288	10569	11090			S43	0.0822354	0.116998	0.177382	0.191846	0.203355
S44	0.065	0.109	0.143	0.175	0.193			S44	0.0747719	0.102353	0.123529	0.145102	0.175594			S44	36.6667	57.8333	90	101	110.5			S44	83.3	21	178.2	26.2	33	31	1575		S44	4587	6356	6447	9703	10743			S44	0.088208	0.118565	0.141321	0.178127	0.193966
S45	0.069	0.122	0.147	0.172	0.185			S45	0.053927	0.117133	0.144764	0.171824	0.196266			S45	24.5	53.8333	61.3333	75.3333	87.3333			S45	46.6	19	151	20.4	19.9	20.3	1176		S45	3665	4428	7645	8829	9900			S45	0.0825856	0.109458	0.143526	0.16373	0.181553
S46	0.07	0.11	0.137	0.195	0.197			S46	0.0680974	0.129805	0.174901	0.195266	0.218113			S46	27.3333	44.5	72.1667	91.3333	110.167			S46	65.7	20	165	24.1	27.9	26.1	1393		S46	3945	5796	10541	11799	13210			S46	0.081327	0.109694	0.171267	0.195661	0.221204
S47	0.069	0.124	0.165	0.18	0.211			S47	0.0733761	0.142692	0.170833	0.17953	0.196859			S47	31.5	64.8333	86.1667	102	116.167			S47	46.8	19	158	18.7	16.6	21.3	1213		S47	3651	7578	8818	9199	9963			S47	0.0871738	0.14525	0.170959	0.185187	0.201724
S48	0.073	0.105	0.138	0.179	0.194			S48	0.0597917	0.110866	0.154253	0.168819	0.187622			S48	18.8333	44.1667	77.8333	90.5	101.167			S48	57.6	21	163	21.7	27	22.9	1278		S48	3636	5084	8749	9538	10557			S48	0.0751709	0.10548	0.161426	0.177166	0.193611
S49	0.072	0.116	0.143	0.157	0.2			S49	0.0676034	0.109007	0.139086	0.157397	0.166138			S49	23.3333	47	74.5	94.3333	107.5			S49	58	20	160	22.7	30.8	21.7	1236		S49	4083	5307	7980	8980	9457			S49	0.0821433	0.1093	0.152112	0.174638	0.187911
S50	0.07	0.117	0.155	0.167	0.226			S50	0.0774523	0.121802	0.155355	0.167002	0.168371			S50	15	39.8333	46.5	60.6667	75.1667			S50	57.7	21	172	22	11.2	32.9	1617		S50	4023	5344	8248	8879	8956			S50	0.0760097	0.104835	0.135518	0.150858	0.16144
S51	0.065	0.113	0.143	0.187	0.204			S51	0.0800433	0.136898	0.167475	0.186984	0.194401			S51	23.6667	57.6667	71.5	83.3333	94.3333			S51	69.3	21	155	28.8	36.2	24.1	1324		S51	4709	9713	11053	11674	12156			S51	0.084626	0.15285	0.174344	0.188004	0.199844
S52	0.072	0.102	0.147	0.158	0.189			S52	0.0602079	0.0897948	0.122107	0.137811	0.152599			S52	27	43.3333	63.6667	80.6667	93.6667			S52	73.1	22	175	23.9	16.6	35.2	1687		S52	3852	5334	7553	8632	9649			S52	0.0780501	0.102527	0.136366	0.157671	0.17569
S53	0.072	0.101	0.153	0.18	0.224			S53	0.0657735	0.0939872	0.160925	0.192185	0.212695			S53	28.1667	39.5	71	80.8333	90.8333			S53	62.7	18	174	20.7	6.7	33.3	1633		S53	3863	5525	9471	12317	12522			S53	0.0820544	0.104742	0.161739	0.194059	0.202724
S54	0.072	0.1	0.168	0.164	0.219			S54	0.0639275	0.118028	0.148739	0.183884	0.221			S54	27	40	78.1667	85	102.167			S54	69	18	180	21.3	9.4	35.7	1720		S54	3641	4698	9141	13362	13826			S54	0.077377	0.095756	0.161773	0.204422	0.220306
S55	0.07	0.109	0.141	0.153	0.202			S55	0.0788379	0.091543	0.131191	0.163145	0.196396			S55	43.8333	66.1667	91.1667	110.667	126.167			S55	102.4	22	178	32.3	32.1	39.9	1871		S55	4368	5591	7481	7670	7983			S55	0.0854137	0.111652	0.145712	0.160712	0.1741
S56	0.059	0.109	0.138	0.163	0.218			S56	0.048091	0.0709251	0.152775	0.143333	0.156652			S56	15.6667	30.6667	55.8333	71.1667	81			S56	68.1	22	179	21.3	9.6	35.3	1700		S56	2652	4115	7355	8750	9602			S56	0.0610158	0.0844128	0.130736	0.153749	0.168123
S57	0.071	0.105	0.166	0.155	0.209			S57	0.0517563	0.0756487	0.129193	0.155301	0.158244			S57	15.3333	30.5	64.5	70.5	84.1667			S57	63.2	26	173	21	13.3	31.2	1554		S57	3062	4481	7069	9212	9386			S57	0.0659435	0.0890582	0.135538	0.158917	0.169804
S58	0.064	0.111	0.134	0.17	0.194			S58	0.0513818	0.0876	0.122909	0.168055	0.173073			S58	20.5	53.5	70.1667	98.5	109			S58	55	26	160	21.3	23.1	22.9	1273		S58	3064	5038	7166	9833	10153			S58	0.071937	0.112209	0.142728	0.186054	0.196095
S59	0.077	0.111	0.15	0.169	0.201			S59	0.0764472	0.111746	0.147366	0.149387	0.154227			S59	26	45.3333	76.1667	91.8333	107.667			S59	65.3	24	162	24.9	25.8	26.6	1417		S59	4276	6598	8825	8986	9174			S59	0.0835163	0.1176	0.158671	0.170805	0.183295
S60	0.068	0.116	0.155	0.178	0.217			S60	0.0676897	0.133414	0.168603	0.1815	0.199879			S60	24.8333	48.1667	45.6667	74	98.3333			S60	58	21	164	21.6	18.2	26.7	1394		S60	3750	5408	9676	10088	10347			S60	0.0801693	0.111005	0.147712	0.170743	0.189669

## Sheet: Non-endurance group
Non-endurance group
VO2 EE								Acti EE (Hip)								HHR									BW	Age	Height	BMI	BF%	Musle mass	RMR		VM								Insert modified models
	4.8	6.42	8.04	9.66	11.28	(km/h)			4.8	6.42	8.04	9.66	11.28	(km/h)			4.8	6.42	8.04	9.66	11.28	(km/h)												4.8	6.42	8.04	9.66	11.28	(km/h)			4.8	6.42	8.04	9.66	11.28	(km/h)
S61	0.055	0.115556	0.162222	0.201667	0.230185			S61	0.0808222	0.113733	0.133378	0.144867	0.1731			S61	18.3333	59.5	80.3333	98	111.167			S61	90	31	177	28.4	17.6	42.9	1964		S61	4601	7387	9048	9871	10093			S61	0.0711663	0.141715	0.179175	0.206843	0.224724
S62	0.0742452	0.112138	0.157425	0.17899	0.21411			S62	0.065841	0.108004	0.160092	0.176728	0.182163			S62	13.5	34.5	57.1667	70.3333	84.3333			S62	54.1	21	160	21.1	17.2	25	1337		S62	4076	6220	8867	9713	9991			S62	0.0815302	0.122578	0.169214	0.191463	0.210769
S63	0.0730047	0.146948	0.156808	0.19507	0.233333			S63	0.0752817	0.136451	0.152239	0.183662	0.193451			S63	18	43.8333	53.8333	70.5	77.8333			S63	71	19	179	18.9	16	24.5	1337		S63	4353	8435	9489	11586	12239			S63	0.079619	0.140226	0.160004	0.19535	0.209014
S64	0.0649913	0.11294	0.174754	0.20364	0.211438			S64	0.0551473	0.082305	0.130537	0.190329	0.23617			S64	16.3333	34.1667	54.3333	67.6667	79.1667			S64	57.7	20	168	20.4	23.4	24.5	1325		S64	3637	5107	7724	10967	13454			S64	0.0799617	0.112365	0.155691	0.194925	0.226594
S65	0.066092	0.136003	0.187101	0.175287	0.215517			S65	0.045364	0.0627969	0.142931	0.162912	0.174061			S65	24.3333	42.3333	57.3333	71.6667	82.6667			S65	52.2	20	156	21.4	20.9	22.9	1262		S65	3285	4137	8070	9050	9597			S65	0.0904867	0.118771	0.164902	0.189535	0.207004
S66	0.118512	0.125704	0.150407	0.181051	0.213258			S66	0.100338	0.110225	0.120075	0.142514	0.170788			S66	41.6667	50	63	73.6667	85.1667			S66	53.3	20	168	18.9	16	24.5	1337		S66	5918	6414	6923	8030	8445			S66	0.129797	0.143603	0.163286	0.184261	0.201426
S67	0.0716771	0.143354	0.18476	0.222686	0.265136			S67	0.042714	0.142965	0.169854	0.183862	0.199395			S67	14.5	39.8333	58.1667	78.5	91.8333			S67	47.9	19	165	17.6	12.3	23.3	1277		S67	3063	7575	8786	9416	10116			S67	0.0791388	0.142136	0.173346	0.20297	0.224403
S68	0.0843434	0.12601	0.17601	0.224495	0.263131			S68	0.0514394	0.0640455	0.0876818	0.109636	0.151773			S68	24	41.3333	64.6667	82	93.3333			S68	66	22	176	21.6	8.7	35.7	1707		S68	2931	3713	5179	6542	7295			S68	0.079895	0.106862	0.146058	0.177092	0.196416
S69	0.070765	0.120492	0.169945	0.187978	0.225137			S69	0.0532623	0.0836066	0.122197	0.13818	0.16459			S69	25.3333	38.1667	61.8333	71.3333	82.6667			S69	61	22	168	23.8	15.3	33	1614		S69	3206	4946	7158	8073	9587			S69	0.0862633	0.114357	0.159187	0.177372	0.202024
S70	0.075188	0.137268	0.161905	0.188972	0.218797			S70	0.0633534	0.0910827	0.102602	0.156226	0.192647			S70	31.1667	46.6667	74.1667	84.8333	93.6667			S70	66.5	19	180	20.5	9.1	34.2	1676		S70	3618	5351	6071	9424	11700			S70	0.0933117	0.124663	0.163803	0.2005	0.227386
S71	0.0642148	0.129749	0.140689	0.167542	0.191769			S71	0.0546935	0.0724869	0.141611	0.168354	0.178704			S71	14.3333	31.5	56.8333	72.8333	88			S71	57.1	20	168	20.2	19.2	25.5	1367		S71	3417	4371	8079	9516	10071			S71	0.0762765	0.104241	0.161611	0.19151	0.214201
S72	0.0642202	0.114424	0.150357	0.170744	0.19476			S72	0.0633945	0.0989755	0.156728	0.171988	0.188654			S72	15.1667	37	55.5	75.1667	88			S72	65.4	23	176	21.1	11.4	32.9	1622		S72	3721	5909	9457	10394	10790			S72	0.0748065	0.117196	0.164972	0.195917	0.214603
S73	0.0774336	0.120374	0.15413	0.177237	0.20059			S73	0.0555015	0.0856342	0.144572	0.165133	0.170074			S73	16.1667	34.3333	63.3333	83.1667	94.8333			S73	67.8	21	178	21.4	12.9	33.8	1645		S73	3113	5035	8788	10099	10414			S73	0.0704513	0.106432	0.168663	0.202433	0.219105
S74	0.0637959	0.109988	0.144936	0.180223	0.198166			S74	0.0608971	0.0867823	0.118923	0.14049	0.160861			S74	11.8333	26.8333	53	73.8333	93.6667			S74	83.6	22	182	25.2	17.6	39.5	1858		S74	3046	5079	7605	9299	10114			S74	0.0557925	0.0886235	0.138752	0.176444	0.206742
S75	0.0852417	0.145038	0.175318	0.209924	0.222901			S75	0.0609313	0.134687	0.155985	0.165313	0.182763			S75	22.3333	47.3333	35.1667	44	85.8333			S75	65.5	18	177	20.9	8.1	34.3	1670		S75	3494	8031	9342	9918	10991			S75	0.0820483	0.144807	0.138898	0.153883	0.213267
S76	0.088059	0.125864	0.145459	0.165514	0.208852			S76	0.0917981	0.152462	0.155643	0.16112	0.182586			S76	25.1667	44.5	54.8333	68.3333	84.6667			S76	72.3	18	173	24.2	13.4	36	1723		S76	5486	9607	9823	10196	10293			S76	0.0957113	0.148532	0.162857	0.182208	0.20314
S77	0.0784314	0.12015	0.163783	0.183968	0.21684			S77	0.0667301	0.0998616	0.119343	0.149187	0.171384			S77	28.6667	46.3333	75.1667	96.8333	110.333			S77	57.8	18	180	17.8	10.1	29.2	1492		S77	4023	5825	6882	8503	9710			S77	0.0979013	0.132422	0.175574	0.213788	0.238977
S78	0.0692884	0.113264	0.15222	0.17068	0.191546			S78	0.0631621	0.0924238	0.201846	0.217287	0.2239			S78	11.6667	30	62	76.1667	88.1667			S78	62.3	19	170	21.6	17	29.1	1486		S78	3767	5483	11889	12793	13180			S78	0.0725183	0.107264	0.191786	0.21568	0.233269
S79	0.0723757	0.118656	0.151197	0.184899	0.207735			S79	0.0701768	0.0880552	0.119613	0.130917	0.165227			S79	35.1667	58.5	85	100	111.667			S79	90.5	19	171	30.9	23.6	40	1863		S79	3653	5173	7859	8821	9186			S79	0.0851247	0.124698	0.17636	0.201694	0.218716
S80	0.0593137	0.104902	0.140196	0.164951	0.195098			S80	0.0704118	0.100368	0.117529	0.129647	0.154735			S80	22.3333	45.1667	65.5	81.8333	92.6667			S80	68	18	169	23.8	15.3	33	1614		S80	4077	5991	7088	7863	9463			S80	0.0847343	0.126446	0.159338	0.185016	0.20965
S81	0.0570749	0.129968	0.1522	0.175783	0.209473			S81	0.0712366	0.0908086	0.100262	0.139358	0.169184			S81	24.1667	47.5	73.1667	92.3333	107.667			S81	84.1	22	174	27.8	19.6	39.1	1831		S81	3891	5437	6186	6904	7364			S81	0.0767219	0.116477	0.153547	0.18234	0.204573
S82	0.0718858	0.115953	0.143033	0.174545	0.205071			S82	0.0675332	0.0921713	0.116396	0.132688	0.161315			S82	27.8333	48.1667	60.8333	55	102			S82	67.7	20	158	27.1	27.6	27.6	1428		S82	3873	5442	6983	8019	8568			S82	0.0902937	0.12649	0.152984	0.153002	0.215125
S83	0.0634254	0.116246	0.140856	0.164266	0.197879			S83	0.0789556	0.110588	0.129496	0.137011	0.171657			S83	22.1667	46.8333	64.8333	84.3333	106.167			S83	83.3	21	163	31.5	24.4	36.7	1738		S83	4441	6917	8400	8988	9352			S83	0.0785383	0.126457	0.159158	0.187454	0.217075
S84	0.081728	0.117046	0.161705	0.183888	0.211617			S84	0.0460771	0.0704553	0.160928	0.18366	0.187566			S84	21.1667	41.1667	69	87.5	100			S84	57.1	19	155	23.8	16.2	27.2	1404		S84	2954	4262	9119	10338	10547			S84	0.0815089	0.115465	0.183977	0.21545	0.232413
S85	0.0796926	0.125965	0.162621	0.174218	0.189725			S85	0.0770712	0.0868689	0.105914	0.139239	0.166173			S85	27.8333	54	77	87.8333	99.3333			S85	123.6	19	180	38.1	27.9	51.4	2295		S85	3926	5061	6113	7660	8466			S85	0.0594725	0.0998642	0.135748	0.160011	0.179913
S86	0.055	0.115556	0.162222	0.201667	0.230185			S86	0.0811889	0.122956	0.145167	0.157411	0.173944			S86	18.3333	59.5	80.3333	98	111.167			S86	90	31	177	28.4	17.6	42.9	1964		S86	4635	8168	10045	11092	11788			S86	0.0714043	0.147182	0.186154	0.21539	0.236589
S87	0.0730047	0.146948	0.156808	0.19507	0.233333			S87	0.0768592	0.128451	0.145831	0.174099	0.18607			S87	18	43.8333	53.8333	70.5	77.8333			S87	71	19	179	18.9	16	24.5	1337		S87	4457	7902	9059	10948	11746			S87	0.080347	0.136495	0.156994	0.190884	0.205563
S88	0.0716771	0.143354	0.18476	0.222686	0.265136			S88	0.0429854	0.140146	0.177119	0.196013	0.212359			S88	14.5	39.8333	58.1667	78.5	91.8333			S88	47.9	19	165	17.6	12.3	23.3	1277		S88	3073	7448	9113	9965	10700			S88	0.0792088	0.141247	0.175635	0.206813	0.228491
S89	0.070765	0.120492	0.169945	0.187978	0.225137			S89	0.0515574	0.0892623	0.124148	0.138	0.166033			S89	25.3333	38.1667	61.8333	71.3333	82.6667			S89	61	22	168	23.8	15.3	33	1614		S89	3106	5271	7269	8064	9098			S89	0.0855633	0.116632	0.159964	0.177309	0.198601
S90	0.0852417	0.145038	0.175318	0.209924	0.222901			S90	0.0600458	0.13084	0.156901	0.173344	0.191985			S90	22.3333	47.3333	35.1667	44	85.8333			S90	65.5	18	177	20.9	8.1	34.3	1670		S90	3438	7796	9401	10414	11561			S90	0.0816563	0.143162	0.139311	0.157355	0.217257

## Sheet: Endurance group
Endurance group
VO2 EE								Acti EE (Hip)								HHR									BW	Age	Height	BMI	BF%	Musle mass	RMR		VM								Insert modified models
	4.8	6.42	8.04	9.66	11.28	(km/h)			4.8	6.42	8.04	9.66	11.28	(km/h)			4.8	6.42	8.04	9.66	11.28	(km/h)												4.8	6.42	8.04	9.66	11.28	(km/h)			4.8	6.42	8.04	9.66	11.28	(km/h)
S91	0.0804348	0.142754	0.186957	0.199275	0.246377			S91	0.0498696	0.128693	0.165761	0.217152	0.229826			S91	24	47.5	70	86.8333	99			S91	46	21	163	17.3	9.2	19.7	1165		S91	3460	5061	9333	10692	11239			S91	0.080579	0.111015	0.164808	0.188519	0.20174
S92	0.115	0.139444	0.16	0.179444	0.215			S92	0.1243	0.132233	0.14165	0.1635	0.183783			S92	27.1667	40.6667	47	62.1667	75.3333			S92	60	22	170	22.4	8.2	31.9	1587		S92	4808	5490	7852	8911	9854			S92	0.0906847	0.10603	0.131607	0.151482	0.168948
S93	0.0721311	0.0956284	0.152896	0.181967	0.227486			S93	0.0594262	0.0949344	0.13277	0.167295	0.183115			S93	22.3333	33.1667	58	73.1667	84.3333			S93	61	22	170	21.2	4.6	32	1596		S93	4132	5597	8911	9742	10651			S93	0.0810053	0.101579	0.148341	0.166164	0.18196
S94	0.0512255	0.0776961	0.145343	0.17549	0.223039			S94	0.06875	0.08525	0.105412	0.146103	0.168529			S94	19.6667	35.1667	60.3333	79.6667	88.8333			S94	68	22	177	21.8	7.6	34.3	1679		S94	3331	5024	6313	8914	9068			S94	0.0698847	0.0956927	0.124457	0.161052	0.168689
S95	0.0790123	0.115741	0.140432	0.165123	0.194753			S95	0.0577037	0.0734444	0.158778	0.170889	0.175278			S95	28.3333	45.8333	65.3333	83.5	94.6667			S95	54	20	162	20	9.8	23.8	1302		S95	3657	4964	8786	9400	9626			S95	0.0829153	0.106613	0.15431	0.172226	0.181876
S96	0.0689542	0.115686	0.15098	0.173399	0.195464			S96	0.0523333	0.0963333	0.133863	0.159078	0.167647			S96	20	34.8333	51.5	63.5	76.5			S96	51	20	156	21	11.8	21.4	1218		S96	3961	5593	7391	8600	9010			S96	0.080865	0.105669	0.133218	0.152283	0.164839
S97	0.0759049	0.107239	0.157482	0.179903	0.201788			S97	0.0972123	0.105381	0.128898	0.164052	0.179676			S97	17.6667	26.6667	43.5	52.1667	60.8333			S97	61.7	21	170	21.3	3.8	33.1	1620		S97	4631	6263	8787	9665	9992			S97	0.0821044	0.10293	0.137127	0.150939	0.159793
S98	0.0641696	0.103078	0.142567	0.170569	0.194959			S98	0.0650871	0.0940171	0.128153	0.145627	0.157753			S98	15.5	34.1667	45.8333	48.3333	61.1667			S98	57.4	24	176	18.5	5.1	29.3	1499		S98	3991	5969	7394	8335	8992			S98	0.0761524	0.106685	0.127467	0.137641	0.152306
S99	0.0722928	0.106171	0.158802	0.186328	0.217483			S99	0.0855354	0.0943013	0.130544	0.157877	0.175318			S99	18.3333	35	54.1667	59	66.1667			S99	55.1	19	166	20	7.2	26.5	1405		S99	4557	5530	7922	8821	9724			S99	0.0838664	0.10399	0.13859	0.149977	0.162992
S100	0.0688976	0.109239	0.146654	0.169449	0.198976			S100	0.0552953	0.120118	0.16122	0.175335	0.18813			S100	16	42.8333	81.5	90.3333	101.167			S100	50.8	39	164	18.9	8.6	23.3	1281		S100	3615	5754	7717	8868	9957			S100	0.0750828	0.112634	0.156672	0.173055	0.190244
S101	0.0683824	0.115637	0.148971	0.178137	0.197382			S101	0.0586029	0.0825	0.139191	0.165971	0.173324			S101	38.5	71.5	85.8333	97.1667	108.333			S101	68	19	169	23.8	18.8	27.4	1434		S101	3321	4849	11667	11462	11956			S101	0.082639	0.118897	0.190034	0.195919	0.20798
S102	0.0692216	0.127451	0.141711	0.170826	0.201028			S102	0.0673975	0.11107	0.16549	0.17657	0.191604			S102	29.8333	48.1667	60.8333	70	80.8333			S102	56.1	20	169	19.6	11.4	24.6	1335		S102	4117	6948	9289	10612	10667			S102	0.0874504	0.125433	0.15514	0.173299	0.181182
S103	0.0805898	0.129396	0.160151	0.185871	0.229787			S103	0.0980247	0.116008	0.145391	0.179239	0.215391			S103	17.1667	27.3333	50.1667	66.5	74.8333			S103	48.6	18	169	17	2.7	26	1361		S103	4703	6438	9607	11154	11978			S103	0.0863283	0.108877	0.15297	0.178033	0.191132
S104	0.0768834	0.116357	0.168731	0.209494	0.23968			S104	0.0635759	0.0959288	0.140093	0.164164	0.17531			S104	28.6667	40.6667	61.1667	77.1667	87.3333			S104	64.6	20	170	22.4	8.2	31.9	1587		S104	4288	5648	8937	9791	10465			S104	0.0856523	0.106076	0.149658	0.168256	0.181256
S105	0.0680507	0.119775	0.14677	0.170127	0.193483			S105	0.0613668	0.0954671	0.115917	0.145761	0.14955			S105	6	30.8333	53.8333	63.1667	74.6667			S105	57.8	19	167	20.7	8.6	27.6	1433		S105	4276	5584	7784	8318	8523			S105	0.0721188	0.100827	0.136313	0.147484	0.157172
S106	0.0778328	0.14879	0.165842	0.190869	0.214521			S106	0.0566502	0.169294	0.191881	0.222393	0.240726			S106	16.3333	38.6667	46.3333	52.3333	62			S106	60.6	19	176	19.6	5.4	31.3	1562		S106	3379	9395	10513	11110	11314			S106	0.0702559	0.139631	0.154922	0.164387	0.172816
S107	0.0730748	0.122541	0.150646	0.195616	0.220067			S107	0.0644519	0.102901	0.149933	0.164334	0.186981			S107	13.3333	37.8333	44.8333	57.6667	68			S107	59.3	19	174	19.6	6.3	30.1	1515		S107	3910	6053	8672	9477	10067			S107	0.0733776	0.109374	0.137719	0.153716	0.166073
S108	0.0618467	0.118682	0.150825	0.175215	0.201638			S108	0.0446341	0.0717596	0.166359	0.174094	0.196167			S108	5.83333	18.3333	34.8333	47.8333	56			S108	57.4	18	178	18.1	5.1	29.4	1500		S108	3428	4353	8917	9875	10904			S108	0.0644927	0.0813427	0.133672	0.15116	0.16599
S109	0.0702065	0.11767	0.150442	0.170206	0.205841			S109	0.0618407	0.0829027	0.117434	0.137115	0.147805			S109	12	27.6667	35.3333	43.6667	50.5			S109	56.5	19	165	20.8	7.5	27.8	1428		S109	3766	4884	6717	7762	8331			S109	0.0720095	0.0927562	0.114482	0.12957	0.139352
S110	0.0697329	0.112868	0.155401	0.175634	0.197082			S110	0.065905	0.0766914	0.123427	0.132018	0.141988			S110	17.1667	34	53.3333	64.8333	79			S110	67.4	21	176	21.8	8.9	33.3	1634		S110	3835	4516	7476	8022	8652			S110	0.0728951	0.0905044	0.13033	0.143087	0.158418
S111	0.0712682	0.119241	0.152076	0.177041	0.204998			S111	0.0653311	0.0764871	0.111684	0.12321	0.161481			S111	22.6667	39.8333	69.3333	79.5	90.3333			S111	89.1	20	178	28.1	20.1	39.5	1859		S111	3319	4255	7202	8168	8861			S111	0.0655138	0.0856454	0.132287	0.147915	0.16154
S112	0.0582329	0.119811	0.152324	0.169535	0.195927			S112	0.0233613	0.0398424	0.0817332	0.0948424	0.122458			S112	28.3333	48.8333	69.8333	80.5	92.1667			S112	58.1	18	167	20.8	12	25.3	1365		S112	2591	3963	7711	8885	9567			S112	0.0720954	0.0984244	0.146478	0.164319	0.178414
S113	0.0638781	0.10214	0.143645	0.174721	0.219488			S113	0.0651751	0.0958444	0.128833	0.145837	0.156926			S113	26.1667	45	66.3333	74.5	87.1667			S113	51.4	18	161	19.8	9.6	23.1	1272		S113	4125	5797	7682	8020	8555			S113	0.0864271	0.114319	0.145834	0.154445	0.167899
S114	0.0626478	0.128983	0.155556	0.172411	0.195671			S114	0.0516879	0.0871206	0.173872	0.196496	0.228809			S114	11.6667	23.5	53.6667	68.1667	81.3333			S114	70.5	30	180	21.8	7.6	35.7	1730		S114	3418	5102	10851	12349	12503			S114	0.0644642	0.0876905	0.160005	0.183376	0.193742
S115	0.0564063	0.10952	0.145784	0.185901	0.202746			S115	0.051807	0.0816692	0.130107	0.15827	0.163568			S115	12.1667	33.3333	55	71.1667	85.3333			S115	65.3	33	169	22.9	10	31	1564		S115	3003	4837	7807	9537	9861			S115	0.062625	0.0935666	0.135073	0.161669	0.174247
S116	0.115	0.139444	0.16	0.179444	0.215			S116	0.1143	0.142233	0.15165	0.1635	0.183783			S116	27.1667	40.6667	47	62.1667	75.3333			S116	60	22	170	22.4	8.2	31.9	1587		S116	6808	7817	8223	9763	10343			S116	0.108685	0.126973	0.134946	0.15915	0.173349
S117	0.0721311	0.0956284	0.142896	0.181967	0.217486			S117	0.0694262	0.149493	0.15277	0.167295	0.173115			S117	22.3333	33.1667	58	73.1667	84.3333			S117	61	22	170	21.2	4.6	32	1596		S117	4132	5597	8911	9742	10651			S117	0.0810053	0.101579	0.148341	0.166164	0.18196
S118	0.0722928	0.106171	0.158802	0.186328	0.217483			S118	0.0755354	0.0943013	0.130544	0.157877	0.175318			S118	18.3333	35	54.1667	59	66.1667			S118	55.1	19	166	20	7.2	26.5	1405		S118	4557	5530	7922	8821	9724			S118	0.0838664	0.10399	0.13859	0.149977	0.162992
S119	0.0778328	0.14879	0.165842	0.190869	0.214521			S119	0.0567987	0.139439	0.171535	0.178828	0.18896			S119	16.3333	38.6667	46.3333	52.3333	62			S119	60.6	19	176	19.6	5.4	31.3	1562		S119	3379	9395	10513	11110	11314			S119	0.0702559	0.139631	0.154922	0.164387	0.172816
S120	0.0697329	0.102868	0.145401	0.169634	0.197082			S120	0.0684421	0.0981454	0.122226	0.136528	0.157923			S120	17.1667	34	53.3333	64.8333	79			S120	67.4	21	176	21.8	8.9	33.3	1634		S120	3835	4516	7476	8022	9952			S120	0.0728951	0.0905044	0.13033	0.143087	0.170118
